# Supplementary material for: Global burden of Tracheal, bronchus, and lung cancer based on age and sex: a systematic trend analysis of the global burden of disease study 2021
Source: Research Square preprint supplement (doi:10.21203/rs.3.rs-6607233/v1), 2025-05-14
Supplement: Supplementary file 1 [file 2eecc785fd7344848f5d9733.docx]

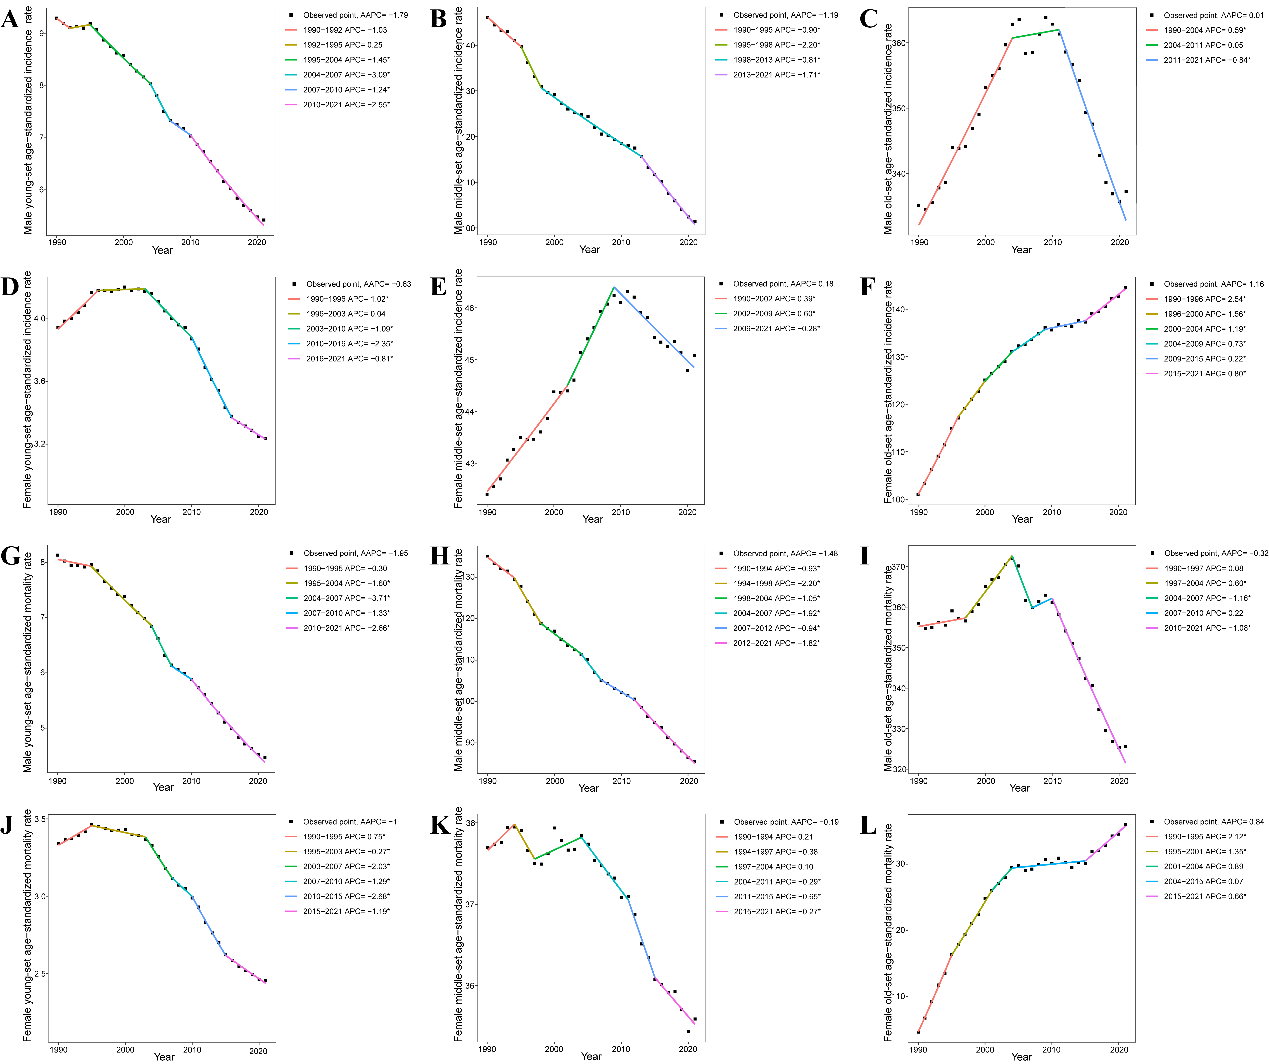


Figure 1 Gender-age-specific ASIR and ASDR trends of TBL cancer from 1990 to 2021. (A) AAPC for young-onset male TBL cancer incidence rate. (B) AAPC of middle-onset male TBL cancer incidence rate. (C) AAPC of old-onset male TBL cancer incidence rate. (D) AAPC for young-onset female TBL cancer incidence rate. (E) AAPC for middle-onset female TBL cancer incidence rate. (F) AAPC for old-onset female TBL cancer incidence rate. (G) AAPC for young-onset male TBL cancer mortality rate. (H) AAPC of middle-onset male TBL cancer mortality rate. (I) AAPC of old-onset male TBL cancer mortality rate. (J) AAPC for young-onset female TBL cancer mortality rate. (K) AAPC for middle-onset female TBL cancer mortality rate. (L) AAPC for old-onset female TBL cancer mortality rate. *: P <0.05. TBL: Tracheal, bronchus, and lung; ASIR: age-standardized incidence rate; ASMR: age-standardized mortality rate


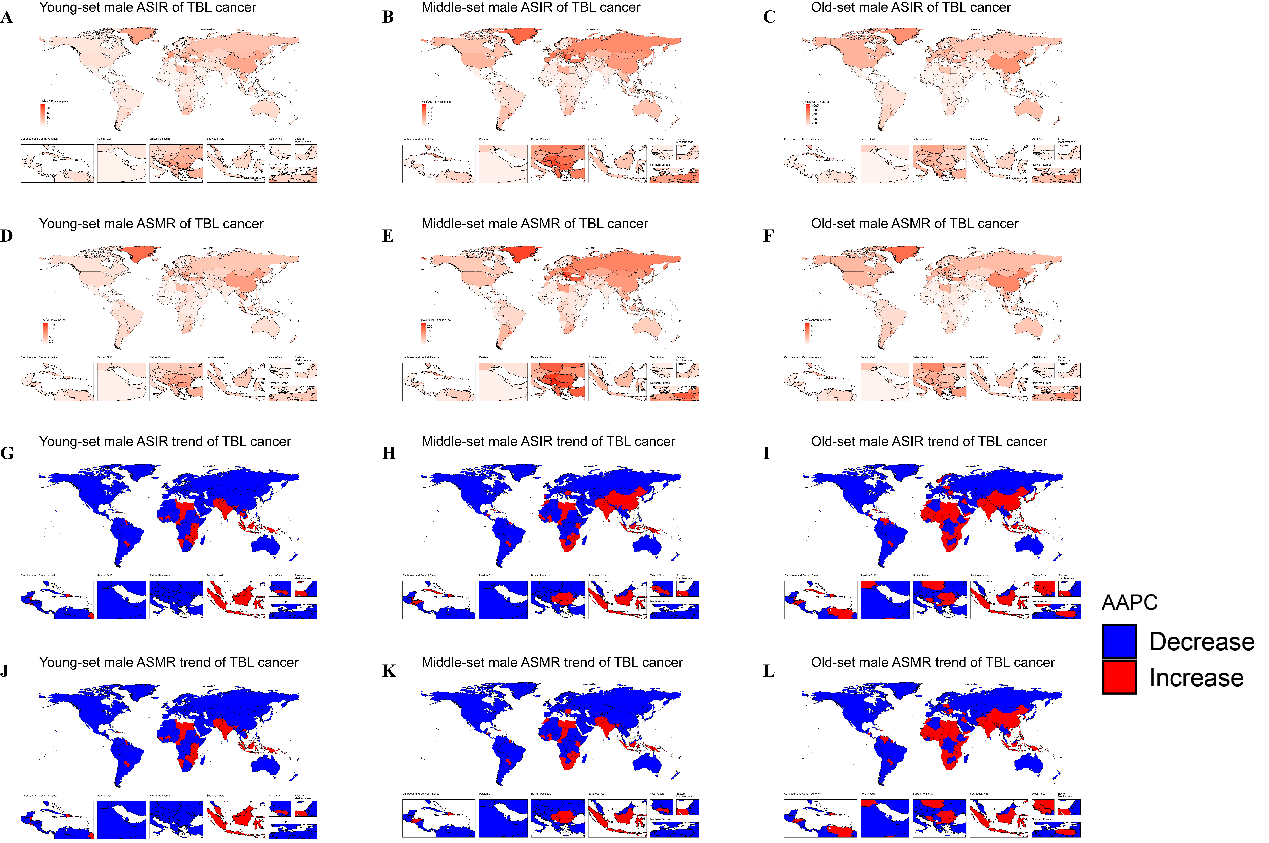


Figure 2 World map for male TBL cancer pattern in 2021 and TBL cancer burdens from 1990 to 2021 in pre-defined age groups. (A) ASIR for young-set male TBL cancer. (B) ASIR for middle-set male TBL cancer. (C) ASIR for old-set male TBL cancer. (D) ASMR for young-set male TBL cancer. (E) ASMR for middle-set male TBL cancer. (F) ASMR for old-set male TBL cancer. (G) ASIR trend for young-set male TBL cancer. (H) ASIR trend for middle-set male TBL cancer. (I) ASIR trend for old-set male TBL cancer. (J) ASMR trend for young-set male TBL cancer. (K) ASMR trend for middle-set male TBL cancer. (L) ASMR trend for old-set male TBL cancer. TBL: Tracheal, bronchus, and lung; ASIR: age-standardized incidence rate; ASMR: age-standardized mortality rate


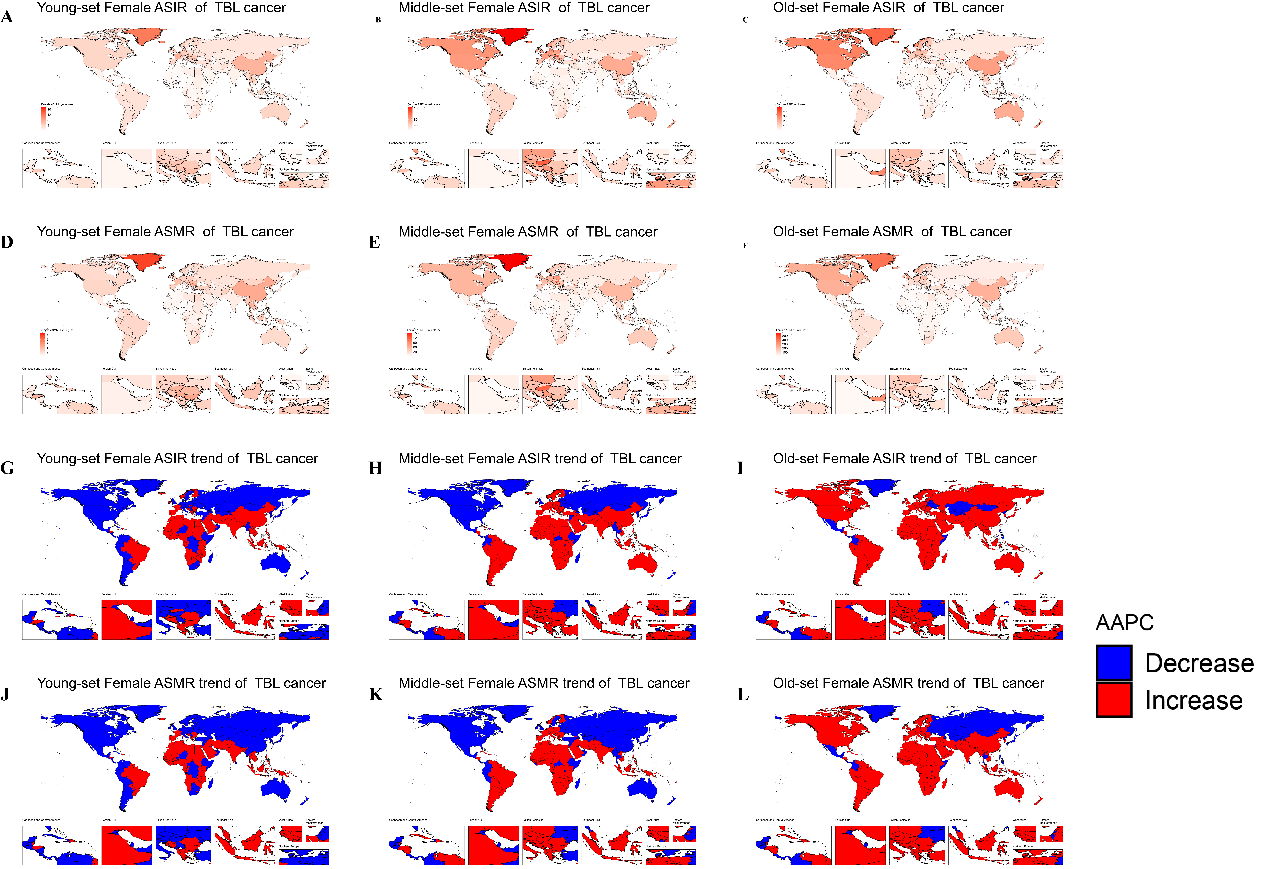


Figure 3 World map for female TBL cancer pattern in 2021 and TBL cancer burdens from 1990 to 2021 in pre-defined age groups. (A) ASIR for young-set female TBL cancer. (B) ASIR for middle-set female TBL cancer. (C) ASIR for old-set female TBL cancer. (D) ASMR for young-set female TBL cancer. (E) ASMR for middle-set female TBL cancer. (F) ASMR for old-set female TBL cancer. (G) ASIR trend for young-set female TBL cancer. (H) ASIR trend for middle-set female TBL cancer. (I) ASIR trend for old-set female TBL cancer. (J) ASMR trend for young-set female TBL cancer. (K) ASMR trend for middle-set female TBL cancer. (L) ASMR trend for old-set female TBL cancer. TBL: Tracheal, bronchus, and lung; ASIR: age-standardized incidence rate; ASMR: age-standardized mortality rate

**Table 1. The male ASIR per 100,000 and AAPC of different group TBL cancer according to regional stratification between 1990 and 2021**

|  | **Young-set** | | | |  | **Middle-set** | | | |  | **Old-set** | | | | | |
| --- | --- | --- | --- | --- | --- | --- | --- | --- | --- | --- | --- | --- | --- | --- | --- | --- |
|  | Incidence1990 | Incidence2021 | AAPC | *P* |  | Incidence1990 | Incidence2021 | AAPC | *P* |  | | Incidence1990 | Incidence2021 | AAPC | *P* | |
| **WHO region** | | | | | | | | | | | | | | | | | | |
| African | 2.91  (2.43~3.54) | 2.19  (1.87~2.65) | -0.92  (-1.11~-0.73) | * |  | 36.46  (30.80~43.92) | 33.80  (29.57~39.23) | -0.25  (-0.42~-0.08) | * |  | | 71.93  (60.62~83.97) | 74.71  (66.49~84.22) | 0.12  (-0.05~0.28) | 0.18 | |
| Eastern mediterranean | 3.90  (3.26~4.65) | 3.66  (3.03~4.43) | -0.22  (-0.3~-0.14) | * |  | 54.68  (46.49~64.76) | 57.23  (48.28~67.96) | 0.15 (0.09~0.21) | * |  | | 113.53  (94.39~135.89) | 137.80  (117.81~162.27) | 0.63 (0.57~0.69) | * | |
| European | 17.92  (17.15~18.76) | 6.91  (6.40~7.45) | -3.08  (-3.19~-2.97) | * |  | 263.98  (257.13~271.52) | 151.21  (142.94~159.22) | -1.76  (-1.92~-1.60) | * |  | | 467.02  (443.51~484.85) | 363.08  (330.07~387.09) | -0.80  (-0.87~-0.73) | * | |
| Americas | 9.70  (9.39~10.05) | 3.17  (3.01~3.36) | -3.59  (-3.75~-3.44) | * |  | 188.65  (183.24~194.00) | 79.53  (76.33~82.72) | -2.74  (-2.94~-2.54) | * |  | | 457.21  (427.97~475.96) | 283.94  (257.87~300.80) | -1.52  (-1.66~-1.39) | * | |
| South-East Asia | 3.28  (2.77~3.97) | 3.19  (2.67~3.72) | -0.06  (-0.25~0.13) | 0.54 |  | 44.69  (37.90~54.40) | 44.63  (38.19~51.36) | -0.01  (-0.16~0.14) | 0.90 |  | | 82.47  (66.331~100.56) | 94.33  (79.74~109.19) | 0.43 (0.22~0.65) | * | |
| Western Pacific | 10.91  (8.95~13.08) | 9.59  (7.25~12.34) | -0.41  (-0.58~-0.24) | * |  | 138.23  (114.80~163.41) | 143.62  (108.50~184.50) | 0.09  (-0.07~0.25) | 0.27 |  | | 384.53  (335.30~434.62) | 544.89  (434.58~655.90) | 1.12 (0.94~1.31) | * | |
| **Heathy system Grouping levels** | | | | | | | | | | | | | | | | | | |
| Minimal | 2.16  (1.53~3.43) | 2.21  (1.49~3.57) | 0.1  (-0.02~0.21) | 0.09 |  | 34.94  (25.12~54.90) | 33.09  (23.33~51.35) | -0.18  (-0.25~-0.11) | * |  | | 69.42  (50.75~102.01) | 74.51  (56.65~105.72) | 0.24  (0.18~0.30) | * | |
| Limited | 2.73  (2.30~3.39) | 2.60  (2.25~3.07) | -0.11  (-0.28~0.06) | 0.21 |  | 36.81  (31.28~45.78) | 34.74  (30.39~39.59) | -0.16  (-0.38~0.07) | 0.17 |  | | 63.50  (52.83~78.50) | 66.70  (58.84~75.05) | 0.17  (-0.03~0.37) | 0.11 | |
| Basic | 9.74  (8.22~11.40) | 7.56  (5.95~9.40) | -0.89  (-1.07~-0.70) | * |  | 122.21  (103.31~142.48) | 119.63  (93.34~149.71) | -0.09  (-0.22~0.03) | 0.13 |  | | 274.13  (235.79~313.18) | 410.58  (320.65~502.36) | 1.29  (1.1~1.48) | * | |
| Advanced | 14.6  (14.18~15.20) | 5.50  (5.18~5.84) | -3.19  (-3.32~-3.06) | * |  | 244.67  (239.25~250.23) | 131.07  (125.43~136.39) | -2.00  (-2.15~-1.86) | * |  | | 511.90  (484.26~527.96) | 405.62  (366.98~429.15) | -0.74  (-0.9~-0.58) | * | |
| **World bank Income levels** | | | | | | | | | | | | | | | | | | |
| Low | 3.51  (2.65~5.13) | 2.76  (2.01~5.04) | -0.78  (-0.85~-0.70) | * |  | 46.69  (35.80~66.22) | 39.67  (29.25~53.32) | -0.53  (-0.58~-0.47) | * |  | | 84.34  (66.71~115.83) | 87.48  (68.73~112.31) | 0.13  (0.05~0.20) | * | |
| Low middle | 4.08  (3.64~4.60) | 3.35  (2.84~3.82) | -0.61  (-0.82~-0.40) | * |  | 62.76  (56.98~70.47) | 50.98  (44.16~57.32) | -0.66  (-0.8~-0.51) | * |  | | 103.54  (91.47~117.18) | 99.58  (86.16~111.43) | -0.13  (-0.21~-0.05) | * | |
| Up middle | 11.77  (10.18~13.52) | 8.30  (6.58~10.40) | -1.10  (-1.36~-0.83) | * |  | 154.4  (135.48~175.04) | 132.26  (104.37~165.28) | -0.51  (-0.69~-0.34) | * |  | | 305.83  (267.13~346.45) | 429.50  (337.73~524.79) | 1.10  (0.90~1.30) | * | |
| High | 13.17  (12.76~13.59) | 4.77  (4.52~5.03) | -3.29  (-3.38~-3.19) | * |  | 230.44  (225.20~235.31) | 121.89  (116.89~126.22) | -2.06  (-2.16~-1.97) | * |  | | 536.58  (507.14~553.71) | 419.06  (377.74~443.54) | -0.79  (-0.94~-0.65) | * | |
| **SDI levels** | | | | | | | | | | | | | | | | | | |
| Low | 2.17  (1.71~3.02) | 1.97  (1.59~2.48) | -0.29  (-0.36~-0.22) | * |  | 29.87  (23.87~40.60) | 26.06  (21.35~31.95) | -0.43  (-0.47~-0.39) | * |  | | 56.14  (44.51~73.45) | 56.00  (47.73~65.63) | 0.02  (-0.09~0.13) | 0.75 | |
| Low-middle | 3.06  (2.59~3.75) | 3.07  (2.66~3.56) | 0.03  (-0.08~0.14) | 0.59 |  | 41.60  (35.62~51.23) | 43.42  (38.93~48.63) | 0.17 (0.03~0.32) | * |  | | 75.43  (63.51~91.64) | 86.40  (77.39~96.44) | 0.45 (0.39~0.51) | * | |
| Middle | 7.73  (6.67~9.00) | 6.13  (4.86~7.42) | -0.82  (-1.03~-0.60) | * |  | 98.23  (84.78~113.41) | 95.35  (75.57~116.41) | -0.08  (-0.16~0.00) | 0.07 |  | | 216.65  (188.2~245.05) | 307.32  (241.1~374.28) | 1.14 (0.97~1.31) | * | |
| High-middle | 16.43  (14.83~18.08) | 9.01  (7.36~11.02) | -1.95  (-2.33~-1.57) | * |  | 226.22  (210.28~243.10) | 159.31  (132.78~191.31) | -1.14  (-1.35~-0.93) | * |  | | 398.15  (364.35~433.21) | 467.00  (383.48~554.60) | 0.53 (0.38~0.67) | * | |
| High | 12.24  (11.82~12.7) | 4.76  (4.42~5.11) | -3.05  (-3.17~-2.93) | * |  | 221.82  (216.29~227.53) | 117.02  (111.14~123.02) | -2.08  (-2.18~-1.99) | * |  | | 550.89  (519.41~570.27) | 431.45  (387.92~460.42) | -0.79  (-0.99~-0.58) | 0.43 | |
| **Region** | | | | | | | | | | | | | | | |  | |
| Andean Latin America | 3.90  (3.00~5.03) | 2.51 (1.79~3.46) | -1.40  (-2.33~-0.47) | * |  | 50.33 (40.71~62.52) | 29.46 (21.79~39.58) | -1.48  (-2.3~-0.65) | * |  | | 137.71 (111.21~170.59) | 106.99 (81.16~138.84) | -0.75  (-1.41~-0.08) | * | |
| Australasia | 7.62 (6.48~8.91) | 4.44 (3.57~5.50) | -1.78  (-2.14~-1.42) | * |  | 183.42 (166.83~200.97) | 91.03 (78.64~104.78) | -2.21  (-2.47~-1.96) | * |  | | 478.48 (425.9~534.47) | 338.38 (280.09~400.90) | -1.08  (-1.28~-0.88) |  | |
| Caribbean | 7.87 (6.81~9.11) | 4.96 (3.94~6.11) | -1.44  (-1.75~-1.14) | * |  | 94.64 (85.5~105.78) | 88.00 (73.65~103.30) | -0.17  (-0.41~0.06) | 0.16 |  | | 271.48 (240.78~304.42) | 247.41 (206.12~293.80) | -0.28  (-0.57~0.01) | 0.07 | |
| Central Asia | 16.32 (14.83~17.72) | 4.68 (4.06~5.33) | -3.96  (-4.38~-3.54) | * |  | 208.11 (194.89~222.01) | 80.11 (70.2~89.76) | -3.11  (-3.3~-2.92) | * |  | | 235.27 (218.12~252.25) | 152.34 (136.17~167.7) | -1.36  (-1.75~-0.97) | * | |
| Central Europe | 21.73 (20.49~22.99) | 7.54 (6.66~8.33) | -3.44  (-3.6~-3.29) | * |  | 276.28 (265.34~287.52) | 200.35 (182.32~216.85) | -1.04  (-1.20~-0.89) | * |  | | 361.67 (342.89~378.73) | 398.43 (361.62~430.32) | 0.34 (0.22~0.46) | * | |
| Central Latin America | 3.88 (3.62~4.16) | 2.12 (1.83~2.46) | -1.96  (-2.41~-1.50) | * |  | 56.46 (53.92~59.11) | 33.26 (28.37~39.03) | -1.86  (-2.13~-1.59) | * |  | | 150.40 (141.38~157.88) | 104.89 (91.17~118.96) | -1.16  (-1.57~-0.74) | * | |
| Central Sub-Saharan  Africa | 3.51 (2.18~6.01) | 3.00 (1.84~5.05) | -0.49  (-0.62~-0.36) | * |  | 56.11 (35.50~95.07) | 48.05 (30.33~80.97) | -0.49  (-0.63~-0.35) | * |  | | 99.74 (61.64~169.42) | 101.00 (65.40~165.80) | 0.06  (-0.04~0.16) | 0.25 | |
| East Asia | 12.01 (9.53~14.77) | 10.96 (8.16~14.42) | -0.27  (-0.47~-0.07) | * |  | 141.01 (110.56~172.86) | 154.26 (112.61~203.79) | 0.27 (0.08~0.46) | * |  | | 363.78 (298.97~433.33) | 568.95 (426.9~714.5) | 1.50  (1.25~1.75) | * | |
| Eastern Europe | 22.19 (20.91~23.62) | 8.07 (7.09~9.26) | -3.37  (-3.66~-3.08) | * |  | 328.18 (316.71~339.61) | 171.75 (151.65~192.82) | -1.86  (-2.55~-1.17) | * |  | | 402.92 (382.8~422.55) | 300.99 (270.35~330.96) | -0.95  (-1.58~-0.31) |  | |
| Eastern Sub-Saharan  Africa | 2.81 (2.12~4.05) | 2.08 (1.67~2.73) | -0.97  (-1.07~-0.87) | * |  | 38.26 (30.19~51.41) | 27.47 (22.73~34.34) | -1.06  (-1.15~-0.98) | * |  | | 63.05 (50.24~78.03) | 66.65 (54.58~79.57) | 0.19  (0.1~0.27) | * | |
| High-income  Asia Pacific | 7.25  (6.61~8.02) | 3.94 (3.4~4.57) | -1.98  (-2.49~-1.46) | * |  | 129.89 (122.27~138.3) | 98.56 (87.85~108.43) | -0.92  (-1.08~-0.76) | * |  | | 510.45 (473.21~544.56) | 543.5 (468.04~604.82) | 0.16  (-0.1~0.42) | .023 | |
| High-income  North America | 13.54 (13.01~14.1) | 3.80 (3.61~4.00) | -3.99  (-4.21~-3.76) | * |  | 278.78 (269.94~288.14) | 110.95 (106.23~115.97) | -2.93  (-3.15~-2.72) | * |  | | 633.45 (590.77~661.87) | 404.79 (365.39~431.57) | -1.43  (-1.61~-1.26) | * | |
| North Africa and  Middle East | 7.31  (5.38~9.79) | 4.04 (3.33~4.90) | -1.91  (-2.01~-1.82) | * |  | 101.93 (79.11~128.88) | 78.19 (65.20~93.81) | -0.89  (-1.01~-0.78) | * |  | | 191.09 (149.07~242.59) | 192.94 (158.96~232.33) | 0.01  (-0.22~0.24) | 0.95 | |
| Oceania | 5.37  (3.51~8.65) | 5.27 (3.41~8.18) | -0.04  (-0.1~0.03) | 0.25 |  | 70.42 (46.98~109.21) | 67.11 (46.15~101.26) | -0.14  (-0.24~-0.04) | * |  | | 186.14 (133.29~278.72) | 192.09 (133.33~289.98) | 0.11 (0.03~0.20) | * | |
| South Asia | 2.52  (2.09~3.04) | 2.63 (2.09~3.21) | 0.15  (-0.04~0.34) | 0.12 |  | 31.90 (27.04~38.21) | 32.40 (26.15~38.15) | 0.09  (-0.33~0.51) | 0.69 |  | | 52.95 (42.92~63.67) | 57.92 (47.06~67.87) | 0.32 (0.07~0.57) | * | |
| Southeast Asia | 6.11  (5.17~7.32) | 5.78 (4.56~7.19) | -0.16  (-0.33~0.01) | 0.06 |  | 96.14 (80.55~115.19) | 90.79 (74.02~108.82) | -0.19  (-0.29~-0.09) | * |  | | 199.81 (162.10~238.40) | 229.56 (186.09~276.14) | 0.43 (0.33~0.52) | * | |
| Southern Latin America | 14.43 (12.37~16.76) | 4.01 (3.36~4.75) | -3.96  (-4.23~-3.69) | * |  | 173.02 (157.04~190.06) | 87.71 (77.56~98.38) | -2.12  (-2.23~-2.01) | * |  | | 305.89 (271.38~341.75) | 224.74 (194.07~255.98) | -0.99  (-1.21~-0.78) | * | |
| Southern Sub-Saharan  Africa | 10.18 (8.17~12.62) | 6.89 (5.71~8.28) | -1.24  (-1.65~-0.83) | * |  | 89.69 (73.23~113.53) | 97.97 (84.18~113.39) | 0.28  (-0.55~1.12) | 0.51 |  | | 160.67 (132.33~198.12) | 183.32 (156.8~211.45) | 0.37  (-0.07~0.81) | 0.10 | |
| Tropical Latin America | 5.52  (5.12~5.96) | 2.90 (2.66~3.14) | -2.08  (-2.41~-1.73) | * |  | 81.32 (76.81~85.92) | 54.86 (50.81~58.66) | -1.21  (-1.33~-1.10) | * |  | | 161.88 (149.59~172.50) | 154.39 (138.59~167.46) | -0.03  (-0.11~0.06) | 0.57 | |
| Western Europe | 14.31 (13.45~15.22) | 6.01 (5.43~6.64) | -2.71  (-2.85~-2.57) | * |  | 227.8 (219.91~236.19) | 132.91 (124.81~141.11) | -1.73  (-1.86~-1.61) | * |  | | 513.49 (484.68~535.37) | 372.03 (332.02~401.04) | -1.04  (-1.13~-0.95) | * | |
| Western Sub-Saharan  Africa | 0.88  (0.70~1.08) | 0.94 (0.71~1.23) | 0.23 (0.14~0.31) | * |  | 15.77 (12.70~19.14) | 18.22 (14.48~22.47) | 0.48 (0.39~0.58) | * |  | | 40.94 (33.03~49.33) | 48.03 (40.16~56.95) | 0.55 (0.50~0.59) | * | |

**Table 2. The female incidence rate per 100,000 and AAPC of different group TBL cancer according to regional stratification between 1990 and 2021**

|  | **Young-set** | | | |  | **Middle-set** | | | |  | **Old-set** | | | | | |
| --- | --- | --- | --- | --- | --- | --- | --- | --- | --- | --- | --- | --- | --- | --- | --- | --- |
|  | Incidence1990 | Incidence2021 | AAPC | *P* |  | Incidence1990 | Incidence2021 | AAPC | *P* |  | | Incidence1990 | Incidence2021 | AAPC | *P* | |
| **WHO region** | | | | | | | | | | | | | | | | | | |
| African | 0.83  (0.69~1.00) | 0.76  (0.59~0.95) | -0.25  (-0.65~0.15) | 0.22 |  | 9.97  (8.13~11.90) | 11.75  (9.66~13.68) | 0.49 (0.27~0.72) | * |  | | 24.46  (19.21~30.24) | 39.15  (28.52~39.33) | 1.09 (0.95~1.22) | * | |
| Eastern mediterranean | 1.21  (0.91~1.41) | 1.44  (1.14~1.80) | 0.83 (0.69~0.97) | * |  | 10.41  (8.43~12.62) | 15.11  (12.10~18.52) | 1.22  (1.13~1.30) | * |  | | 27.10  (21.05~33.36) | 50.37  (40.62~60.33) | 2.03  (1.96~2.11) | * | |
| European | 3.28  (3.14~3.44) | 2.50  (2.34~2.67) | -0.88  (-1.01~-0.75) | * |  | 34.37  (33.19~35.45) | 40.48  (38.06~42.70) | 0.48 (0.23~0.73) | * |  | | 86.91  (79.61~91.44) | 116.99  (100.63~126.66) | 0.99 (0.84~1.14) | * | |
| Americas | 4.44  (4.30~4.57) | 2.16  (2.04~2.30) | -2.34  (-2.54~-2.15) | * |  | 68.42  (65.77~70.42) | 42.51  (40.11~44.30) | -1.54  (-1.71~-1.37) | * |  | | 164.12  (145.96~173.70) | 165.37  (141.00~178.75) | 0.00  (-0.15~0.14) | 0.96 | |
| South-East Asia | 1.45  (1.20~1.77) | 1.75  (1.45~2.08) | 0.64 (0.52~0.76) | * |  | 15.04  (12.66~18.16) | 17.61  (13.68~21.28) | 0.49 (0.35~0.63) | * |  | | 35.93  (28.64~44.19) | 48.98  (38.89~58.39) | 1.04 (0.91~1.16) | * | |
| Western Pacific | 5.21  (4.22~6.38) | 4.23  (3.30~5.41) | -0.70  (-0.93~-0.47) | * |  | 48.53  (40.60~57.37) | 49.48  (39.43~61.74) | 0.08  (-0.03~0.19) | 0.16 |  | | 144.64  (122.98~167.28) | 199.82  (158.07~241.19) | 1.07 (0.86~1.28) | * | |
| **Heathy system Grouping levels** | | | | | | | | | | | | | | | | | | |
| Minimal | 0.81  (0.59~1.17) | 0.91  (0.69~1.18) | 0.40  (0.28~0.53) | * |  | 10.49  (7.90~14.20) | 11.30  (8.45~14.72) | 0.23 (0.18~0.27) | * |  | | 18.99  (13.93~25.03) | 24.24  (18.06~31.44) | 0.78  (0.66~0.90) | * | |
| Limited | 1.01  (0.86~1.20) | 1.32  (1.11~1.54) | 0.84 (0.71~0.98) | * |  | 9.65  (8.12~11.44) | 12.88  (10.88~14.95) | 0.93 (0.79~1.06) | * |  | | 18.25  (15.05~21.85) | 27.16  (23.09~31.23) | 1.35  (1.19~1.51) | * | |
| Basic | 4.93  (4.09~5.97) | 4.62  (3.77~5.66) | -0.19  (-0.36~-0.03) | * |  | 43.85  (37.31~51.40) | 53.17  (43.56~64.52) | 0.63  (0.56~0.7) | * |  | | 102.40  (87.51~119.00) | 171.13  (137.65~207.11) | 1.70  (1.51~1.89) | * | |
| Advanced | 5.11  (4.96~5.56) | 3.60  (3.43~3.76) | -1.21  (-1.33~-1.09) | * |  | 57.58  (55.47~59.11) | 60.41  (56.95~63.13) | 0.11  (-0.02~0.25) | 0.10 |  | | 124.11  (111.33~130.79) | 172.33  (144.27~187.54) | 1.02  (0.91~1.13) | * | |
| **World bank Income levels** | | | | | | | | | | | | | | | | | | |
| Low | 1.31  (0.96~1.76) | 1.19  (0.86~1.58) | -0.31  (-0.38~-0.23) | * |  | 14.12  (10.83~18.40) | 13.89  (9.93~18.38) | -0.06  (-0.10~-0.01) | * |  | | 30.69  (23.54~39.57) | 34.20  (22.78~47.28) | 0.35 (0.29~0.40) | * | |
| Low middle | 1.48  (1.28~1.74) | 1.78  (1.54~2.04) | 0.62 (0.50~0.74) | * |  | 15.18  (13.26~17.62) | 17.55  (14.27~20.52) | 0.45 (0.32~0.58) | * |  | | 31.47  (27.49~35.85) | 37.69  (31.24~43.41) | 0.64 (0.48~0.80) | * | |
| Up middle | 5.15  (4.27~6.21) | 4.87  (3.89~6.04) | -0.17  (-0.35~0.02) | 0.08 |  | 44.00  (37.75~50.98) | 54.73  (44.42~67.13) | 0.74 (0.64~0.83) | * |  | | 98.25  (84.85~112.62) | 168.10  (135.65~204.09) | 1.76 (1.58~1.94) | * | |
| High | 5.63  (5.47~5.78) | 3.87  (3.69~4.05) | -1.26  (-1.39~-1.13) | * |  | 67.28  (64.77~69.06) | 69.77  (65.64~73.00) | 0.10  (-0.04~0.23) | 0.17 |  | | 140.78  (125.90~148.64) | 196.28  (163.54~214.09) | 1.06 (0.94~1.18) | * | |
| **SDI levels** | | | | | | | | | | | | | | | | | | |
| Low | 0.72 (0.57~0.93) | 0.86 (0.69~1.04) | 0.60 (0.54~0.66) | * |  | 8.16  (6.52~10.29) | 9.58  (7.78~11.36) | 0.52 (0.41~0.63) | * |  | | 14.37 (10.99~18.18) | 20.58 (16.67~24.41) | 1.20 (1.06~1.34) | * | |
| Low-middle | 1.36 (1.17~1.60) | 1.70 (1.45~1.97) | 0.72 (0.62~0.82) | * |  | 12.14 (10.40~14.32) | 16.40 (13.91~19.04) | 0.98 (0.89~1.07) | * |  | | 24.52 (20.91~28.59) | 36.15 (30.68~41.47) | 1.30 (1.15~1.45) | * | |
| Middle | 3.95 (3.31~4.75) | 3.53 (2.95~4.24) | -0.36  (-0.50~-0.23) | * |  | 35.66 (30.52~41.81) | 39.58 (32.98~47.07) | 0.32 (0.23~0.41) | * |  | | 80.56 (69.12~93.83) | 122 .00  (98.17~146.41) | 1.37 (1.24~1.51) | * | |
| High-middle | 5.14 (4.36~6.09) | 5.16 (4.23~6.36) | 0.01  (-0.11~0.14) | 0.83 |  | 41.84 (37.26~47.06) | 59.70 (49.38~72.2) | 1.17 (1.03~1.31) | * |  | | 89.01 (78.55~98.93) | 161.34 (130.63~192.86) | 1.95 (1.88~2.02) | * | |
| High | 6.03 (5.84~6.22) | 4.01 (3.78~4.24) | -1.32  (-1.61~-1.03) | * |  | 74.75 (71.77~76.98) | 71.92 (67.63~75.58) | -0.15  (-0.27~-0.04 | * |  | | 155.55 (138.76~164.29) | 217.09 (180.62~237.06) | 1.04 (0.92~1.17) | 0.43 | |
| **Region** | | | | | | | | | | | | | | | |  | |
| Andean Latin America | 2.78 (2.18~3.58) | 2.44 (1.73~3.37) | -0.48  (-1.68~0.74) | 0.45 |  | 24.23 (19.41~30.18) | 23.99 (17.16~32.26) | 0.12  (-0.77~1.02) | 0.79 |  | | 62.31 (49.83~77.41) | 73.25 (51.52~98.51) | 0.56  (-0.48~1.62) | 0.29 | |
| Australasia | 5.08 (4.34~5.81) | 4.22 (3.42~5.16) | -0.64  (-1.68~0.41) | 0.23 |  | 67.49 (60.24~75.36) | 69.81 (58.66~81.20) | 0.13  (-0.26~0.53) | 0.51 |  | | 135.06 (117.55~151.62) | 213.28 (169.68~255.81) | 1.46 (1.19~1.74) | * | |
| Caribbean | 3.43 (2.99~3.89) | 2.75 (2.21~3.43) | -0.82  (-1.00~-0.63) | * |  | 32.16 (29.11~35.75) | 40.9 (33.92~48.39) | 0.78 (0.61~0.95) | * |  | | 88.80 (78.49~99.30) | 97.88 (80.88~115.97) | 0.40 (0.13~0.66) | * | |
| Central Asia | 3.51 (3.25~3.78) | 1.77 (1.49~2.12) | -2.15  (-2.57~-1.72) | * |  | 30.56 (28.29~32.83) | 15.29 (13.30~17.62) | -2.23  (-2.48~-1.98) | * |  | | 50.86 (46.33~55.11) | 34.87 (30.54~39.14) | -1.31  (-1.69~-0.93) | * | |
| Central Europe | 4.59 (4.29~4.90) | 4.19 (3.72~4.65) | -0.26  (-0.48~-0.04) | * |  | 39.11 (36.80~41.59) | 74.10 (66.91~80.96) | 2.02 (1.66~2.39) | * |  | | 70.32 (64.72~75.01) | 134.19 (119.62~147.09) | 2.17 (2.08~2.25) | * | |
| Central Latin America | 2.48 (2.33~2.64) | 1.80 (1.49~2.16) | -1.03  (-1.38~-0.67) | * |  | 25.33 (23.91~26.76) | 19.66 (16.50~23.25) | -0.88  (-1.21~-0.56) | * |  | | 70.17 (64.66~74.97) | 58.03 (49.17~67.19) | -0.61  (-0.90~-0.32) | * | |
| Central Sub-Saharan  Africa | 1.04 (0.66~1.64) | 1.09 (0.70~1.64) | 0.14 (0.06~0.22) | * |  | 13.30  (8.98~19.78) | 14.68 (10.17~20.67) | 0.32 (0.26~0.37) | * |  | | 23.62 (15.69~34.97) | 28.78 (19.85~42.28) | 0.64 (0.59~0.70) | * | |
| East Asia | 6.78  (5.32~8.53) | 6.87 (5.18~8.99) | 0.05  (-0.17~0.27) | 0.65 |  | 57.70  (46.8~70.10) | 71.95 (55.65~92.20) | 0.72 (0.64~0.81) | * |  | | 140.2 (116.53~168.37) | 236.97 (184.88~294.88) | 1.73 (1.50~1.97) | * | |
| Eastern Europe | 3.20  (2.99~3.41) | 2.52 (2.19~2.94) | -0.78  (-1.12~-0.43) | * |  | 32.00 (30.22~33.86) | 25.20 (22.25~28.56) | -0.76  (-1.17~-0.34) | * |  | | 63.38 (58.71~67.5) | 55.69 (49.27~61.67) | -0.48  (-0.75~-0.21) | * | |
| Eastern Sub-Saharan  Africa | 0.74  (0.57~0.98) | 0.82 (0.61~1.09) | 0.33 (0.22~0.45) | * |  | 9.50  (7.54~12.00) | 10.73 (8.24~13.45) | 0.39 (0.31~0.48) | * |  | | 17.65 (13.78~22.35) | 23.45 (18.37~28.83) | 0.97 (0.93~1.00) | * | |
| High-income  Asia Pacific | 3.85  (3.52~4.19) | 2.95 (2.53~3.45) | -0.88  (-1.32~-0.43) | * |  | 36.06 (33.05~38.71) | 31.21 (27.2~34.88) | -0.54  (-0.9~-0.19) | * |  | | 133.19 (114.77~147.14) | 162.86 (122.03~190.03) | 0.59 (0.37~0.82) | * | |
| High-income  North America | 9.18  (8.80~9.55) | 3.81 (3.61~4.03) | -2.84  (-3.15~-2.53) | * |  | 137.99 (131.73~143.28) | 87.94 (82.12~92.60) | -1.45  (-1.61~-1.29) | * |  | | 237.29 (210.25~253.13) | 294.89 (248.38~321.52) | 0.67 (0.51~0.84) | * | |
| North Africa and  Middle East | 1.84  (1.38~2.51) | 1.83 (1.48~2.26) | 0.02  (-0.11~0.15) | 0.75 |  | 14.05 (10.73~18.75) | 17.51 (14.21~21.08) | 0.67 (0.49~0.84) | * |  | | 32.51 (23.48~43.79) | 54.54 (43.15~66.78) | 1.69 (1.29~2.10) | * | |
| Oceania | 1.95  (1.16~3.26) | 2.39 (1.44~4.07) | 0.73 (0.49~0.97) | * |  | 25.99 (15.77~42.07) | 31.60 (21.15~48.04) | 0.66 (0.60~0.73) | * |  | | 56.52 (37.04~87.46) | 69.57 (48.45~102.06) | 0.66 (0.52~0.79) | * | |
| South Asia | 0.81  (0.67~0.95) | 1.31 (1.08~1.57) | 1.54 (1.32~1.76) | * |  | 6.90  (5.71~8.09) | 11.60 (9.59~13.80) | 1.69 (1.42~1.97) | * |  | | 12.10 (9.39~14.56) | 22.53 (18.75~26.51) | 2.14 (1.78~2.50) | * | |
| Southeast Asia | 3.16  (2.53~3.96) | 3.60 (2.76~4.51) | 0.45 (0.26~0.64) | 0.29 |  | 31.48 (26.00~38.54) | 34.70 (25.74~43.47) | 0.30 (0.24~0.36) | * |  | | 61.97 (49.7~75.86) | 88.67 (66.87~109.66) | 1.16 (1.09~1.24) | * | |
| Southern Latin America | 3.41  (2.93~3.93) | 2.72 (2.31~3.22) | -0.67  (-1.00~-0.35) | * |  | 27.58 (24.45~30.84) | 39.70 (34.69~45.35) | 1.19 (0.94~1.45) | * |  | | 63.71 (54.94~72.35) | 88.39 (72.81~103.39) | 1.04 (0.80~1.29) | * | |
| Southern Sub-Saharan  Africa | 2.98  (2.38~3.66) | 2.44 (1.96~3.02) | -0.75  (-1.31~-0.18) | * |  | 24.06 (17.89~32.10) | 33.01 (27.63~39.20) | 1.05 (0.82~1.28) | * |  | | 52.65 (38.46~71.86) | 78.27 (64.85~93.17) | 1.35 (1.13~1.58) | * | |
| Tropical Latin America | 2.55  (2.37~2.74) | 2.69 (2.49~2.91) | 0.15  (-0.19~0.50) | 0.39 |  | 23.84 (22.25~25.41) | 35.95 (32.96~38.87) | 1.30 (1.02~1.58) | * |  | | 55.51 (49.39~60.12) | 77.73 (66.20~86.06) | 1.14 (0.88~1.40) | * | |
| Western Europe | 4.26  (4.04~4.49) | 4.51 (4.13~4.90) | 0.17  (-0.06~0.4) | 0.15 |  | 44.76 (42.67~46.60) | 72.17 (66.50~77.71) | 1.54 (1.28~1.80) | * |  | | 96.65 (87.58~102.61) | 158.30 (134.25~174.80) | 1.61 (1.47~1.76) | * | |
| Western Sub-Saharan  Africa | 0.35  (0.27~0.45) | 0.40 (0.27~0.54) | 0.41 (0.25~0.57) | * |  | 4.86  (3.77~6.15) | 5.93  (4.42~7.32) | 0.62 (0.54~0.70) | * |  | | 9.09  (7.09~11.42) | 14.75 (11.72~17.49) | 1.59 (1.50~1.68) | * | |

**Table 3. The male death rate per 100,000 and AAPC of different group TBL cancer according to regional stratification between 1990 and 2021**

|  | **Young-set** | | | |  | **Middle-set** | | | |  | **Old-set** | | | | | |
| --- | --- | --- | --- | --- | --- | --- | --- | --- | --- | --- | --- | --- | --- | --- | --- | --- |
|  | Mortality1990 | Incidence2021 | AAPC | *P* |  | Incidence1990 | Incidence2021 | AAPC | *P* |  | | Incidence1990 | Incidence2021 | AAPC | *P* | |
| **WHO region** | | | | | | | | | | | | | | | | | | |
| African | 2.70  (2.25~3.28) | 2.01  (1.71~2.44) | -0.94  (-1.1~-0.77) | * |  | 36.72  (31.02~44.27) | 33.77  (29.53~39.32) | -0.27  (-0.44~-0.11) | * |  | | 86.21  (72.63~100.52) | 89.48  (79.51~101.10) | 0.12  (-0.05~0.28) | 0.18 | |
| Eastern mediterranean | 3.63  (3.04~4.31) | 3.37  (2.79~4.10) | -0.25  (-0.33~-0.18) | * |  | 55.37  (47.14~65.64) | 57.50  (48.42~68.34) | 0.13 (0.07~0.19) | * |  | | 136.07  (113.13~163.02) | 164.19  (140.29~194.27) | 0.61 (0.56~0.67) | * | |
| European | 15.30  (14.67~16.02) | 5.38  (4.98~5.81) | -3.37  (-3.50~-3.23) | * |  | 242.67  (236.51~249.44) | 126.10  (119.26~133.00) | -2.09  (-2.27~-1.91) | * |  | | 499.09  (473.89~518.29) | 356.07  (324.32~379.12) | -1.08  (-1.18~-0.98) | * | |
| Americas | 8.07  (7.81~8.35) | 2.57  (2.44~2.73) | -3.64  (-3.88~-3.40) | * |  | 161.16  (156.81~165.26) | 64.44  (61.83~67.04) | -2.91  (-3.11~-2.71) | * |  | | 443.07  (414.95~460.74) | 263.32  (239.00~278.32) | -1.67  (-1.83~-1.51) | * | |
| South-East Asia | 3.03  (2.57~3.68) | 2.87  (2.40~3.35) | -0.15  (-0.33~0.04) | 0.13 |  | 44.98  (38.18~54.82) | 43.82  (37.39~50.44) | -0.09  (-0.24~0.07) | 0.28 |  | | 98.44  (79.24~119.92) | 110.94  (93.93~128.67) | 0.38 (0.15~0.62) | * | |
| Western Pacific | 9.78  (7.99~11.75) | 7.71  (5.79~9.97) | -0.77  (-0.94~-0.61) | * |  | 130.96  (107.82~155.38) | 116.28  (87.26~149.81) | -0.42  (-0.58~-0.25) | * |  | | 420.33  (365.02~477.63) | 509.31  (403.58~615.51) | 0.64 (0.42~0.85) | * | |
| **Heathy system Grouping levels** | | | | | | | | | | | | | | | | | | |
| Minimal | 2.02  (1.43~3.16) | 2.06  (1.38~3.32) | 0.09  (-0.03~0.20) | 0.14 |  | 35.37  (25.53~55.65) | 33.38  (23.45~51.78) | -0.19  (-0.26~-0.12) | * |  | | 82.90  (60.45~122.05) | 89.32  (67.67~126.47) | 0.25  (0.19~0.32) | * | |
| Limited | 2.53  (2.13~3.15) | 2.37  (2.04~2.80) | -0.17  (-0.33~0.00) | 0.05 |  | 37.12  (31.57~46.15) | 34.42  (30.13~39.24) | -0.21  (-0.45~0.02) | 0.07 |  | | 75.49  (62.70~93.33) | 78.76  (69.59~88.61) | 0.16  (-0.08~0.39) | 0.19 | |
| Basic | 8.89  (7.49~10.40) | 6.29  (4.96~7.81) | -1.09  (-1.25~-0.93) | * |  | 120.14  (101.67~139.95) | 102.28  (80.37~127.44) | -0.55  (-0.67~-0.43) | * |  | | 319.97  (275.99~3665.05) | 410.11  (321.02~499.41) | 0.81  (0.61~1.01) | * | |
| Advanced | 12.22  (11.81~12.68) | 4.12  (3.86~4.38) | -3.47  (-3.63~-3.31) | * |  | 216.25  (211.63~221.07) | 103.50  (99.07~107.778) | -2.35  (-2.46~-2.24) | * |  | | 515.16  (487.48~532.01) | 366.45  (331.95~386.03) | -1.13  (-1.22~-1.05) | * | |
| **World bank Income levels** | | | | | | | | | | | | | | | | | | |
| Low | 3.27  (2.46~4.77) | 2.53  (1.85~3.55) | -0.82  (-0.89~-0.74) | * |  | 47.09  (36.17~66.89) | 39.55  (29.34~53.82) | -0.56  (-0.63~-0.50) | * |  | | 101.01  (79.84~138.69) | 104.78  (82.44~134.88) | 0.13  (0.05~0.20) | * | |
| Low middle | 3.68  (3.29~4.16) | 3.02  (2.56~3.45) | -0.60  (-0.80~-0.40) | * |  | 60.87  (55.15~68.43) | 49.85  (43.24~56.03) | -0.61  (-0.76~-0.47) | * |  | | 119.41  (105.15~135.58) | 116.12  (100.33~129.95) | -0.08  (-0.16~0.00) | 0.06 | |
| Up middle | 10.70  (9.24~12.29) | 6.83  (5.40~8.55) | -1.40  (-1.68~-1.13) | * |  | 150.75  (131.80~170.42) | 111.69  (88.69~139.15) | -0.97  (-1.15~-0.80) | * |  | | 354.37  (309.47~401.61) | 425.41  (334.90~517.34) | 0.58 (0.37~0.79) | * | |
| High | 10.71  (10.40~11.04) | 3.35  (3.20~3.52) | -3.76  (-3.90~-3.61) | * |  | 198.92  (194.86~202.77) | 92.03  (88.77~94.80) | -2.49  (-2.61~-2.37) | * |  | | 534.09  (505.10~551.09) | 372.08  (336.00~391.73) | -1.17  (-1.31~-1.03) | 0.93 | |
| **SDI levels** | | | | | | | | | | | | | | | | | | |
| Low | 2.02 (1.60~2.81) | 1.82 (1.47~2.3) | -0.32  (-0.39~-0.24) | * |  | 30.20 (24.14~41.07) | 26.17 (21.42~32.19) | -0.45  (-0.49~-0.42) | * |  | | 66.86 (52.81~87.35) | 67.36 (57.33~79.05) | 0.05  (-0.07~0.17) | 0.40 | |
| Low-middle | 2.83 (2.40~3.49) | 2.80 (2.43~3.26) | -0.02  (-0.13~0.09) | 0.73 |  | 41.95 (35.93~51.75) | 43.16 (38.62~48.44) | 0.12  (-0.02~0.27) | 0.11 |  | | 89.8 (75.68~109.27) | 102.06 (91.49~113.83) | 0.40  (0.34~0.46) | * | |
| Middle | 7.07 (6.09~8.22) | 5.19 (4.11~6.25) | -1.03  (-1.2~-0.85) | * |  | 97.33 (83.96~112.11) | 84.49 (67.4~102.69) | -0.44  (-0.53~-0.35) | * |  | | 254.64 (221.3~287.85) | 316.74 (249.82~383.34) | 0.71 (0.54~0.87) | * | |
| High-middle | 14.61 (13.15~16.12) | 7.33 (5.99~8.93) | -2.23  (-2.60~-1.86) | * |  | 213.95  (198.31~230.74) | 133.07 (111.52~158.94) | -1.53  (-1.72~-1.33) | * |  | | 445.32 (405.92~485.95) | 457.76 (377.28~540.34) | 0.09  (-0.06~0.25) | 0.24 | |
| High | 9.88 (9.56~10.24) | 3.33 (3.11~3.58) | -3.52  (-3.72~-3.31) | * |  | 189.65 (185.21~194.09) | 86.85 (82.9~90.81) | -2.54  (-2.64~-2.43) | * |  | | 542.21 (512.4~560.65) | 376.22 (339.34~399.16) | -1.18  (-1.33~-1.03) | * | |
| **Region** | | | | | | | | | | | | | | | |  | |
| Andean Latin America | 3.58 (2.76~4.63) | 2.19 (1.57~2.98) | -1.58  (-2.5~-0.64) | * |  | 50.55 (40.96~62.75) | 28.16 (20.78~37.42) | -1.64  (-2.46~-0.82) | * |  | | 164.38 (132.86~204.68) | 124.62 (94.38~162.02) | -0.83  (-1.47~-0.18) | * | |
| Australasia | 5.64 (4.83~6.47) | 2.78 (2.28~3.37) | -2.31  (-2.57~-2.05) | * |  | 152.91 (140.35~165.83) | 63.84 (56.61~71.59) | -2.79  (-2.99~-2.58) | * |  | | 469.75 (419.66~520.86) | 278.37 (237.51~322.38) | -1.65  (-1.79~-1.51) | * | |
| Caribbean | 6.68 (5.80~7.73) | 3.96 (3.11~4.92) | -1.62  (-1.91~-1.32) | * |  | 87.76 (79.24~98.76) | 73.69 (61.99~85.72) | -0.50  (-0.64~-0.36) | * |  | | 298.32 (265.02~333.90) | 240.87 (201.62~281.35) | -0.71  (-0.87~-0.55) | * | |
| Central Asia | 14.88 (13.53~16.20) | 4.19 (3.64~4.77) | -4.02  (-4.43~-3.60) | * |  | 205.19 (191.77~219.01) | 78.07 (68.33~87.29) | -3.12  (-3.30~-2.93) | * |  | | 269.10 (248.99~289.28) | 172.71 (154.04~189.89) | -1.39  (-1.78~-1.00) | * | |
| Central Europe | 19.48 (18.38~20.6) | 6.32 (5.62~6.96) | -3.66  (-3.82~-3.5) | * |  | 267.71 (257.48~278.37) | 184.36 (168.26~199.12) | -1.21  (-1.35~-1.08) | * |  | | 411.38 (390.22~430.85) | 430.72 (391.86~464.20) | 0.18 (0.05~0.31) | * | |
| Central Latin America | 3.55 (3.31~3.80) | 1.86 (1.60~2.16) | -2.09  (-2.55~-1.63) | * |  | 56.22 (53.74~58.87) | 31.8 (27.05~37.32) | -1.95  (-2.38~-1.52) | * |  | | 179.12 (168.13~188.23) | 120.90 (105.00~137.08) | -1.27  (-1.68~-0.85) | * | |
| Central Sub-Saharan  Africa | 3.27 (2.04~5.62) | 2.78 (1.68~4.69) | -0.51  (-0.63~-0.38) | * |  | 56.71 (35.96~96.44) | 48.37 (30.35~81.97) | -0.50  (-0.65~-0.36) | * |  | | 118.58 (73.12~200.72) | 120.44 (77.33~197.51) | 0.07  (-0.03~0.17) | 0.16 | |
| East Asia | 10.93 (8.67~13.43) | 8.86 (6.54~11.67) | -0.68  (-0.88~-0.48) | * |  | 137.85 (108.13~168.89) | 126.15 (91.82~166.92) | -0.33  (-0.52~-0.14) | * |  | | 428.03 (352.4~510.17) | 554.97 (416.77~696.67) | 0.87 (0.62~1.12) | * | |
| Eastern Europe | 19.36 (18.33~20.50) | 6.63 (5.85~7.58) | -3.52  (-3.82~-3.22) | * |  | 305.57 (296.02~315.17) | 147.74 (130.9~165.43) | -2.12  (-2.86~-1.38) | * |  | | 431.16 (411.09~451.03) | 296.38 (266.97~324.61) | -1.22  (-1.80~-0.63) | * | |
| Eastern Sub-Saharan  Africa | 2.62  (1.99~3.77) | 1.92  (1.54~2.52) | -1.00  (-1.1~-0.91) | * |  | 38.66 (30.72~51.81) | 27.58 (22.87~34.59) | -1.09  (-1.17~-1.00) | * |  | | 74.84 (59.68~92.36) | 81.06 (66.53~96.92) | 0.27 (0.18~0.36) | * | |
| High-income  Asia Pacific | 5.62  (5.14~6.22) | 2.29 (2.04~2.62) | -2.90  (-3.2~-2.60) | * |  | 101.33 (96.46~106.95) | 62.08 (57.01~67.16) | -1.60  (-1.71~-1.49) | * |  | | 469.25 (438.72~491.41) | 428.51 (377.10~462.56) | -0.35  (-0.43~-0.27) | * | |
| High-income  North America | 10.75 (10.33~11.19) | 2.79 (2.65~2.93) | -4.23  (-4.46~-4.00) | * |  | 227.9 (220.82~235.23) | 82.46 (79.18~85.75) | -3.24  (-3.45~-3.03) | * |  | | 587.44 (548.1~613.07) | 348.22 (313.46~369.90) | -1.69  (-1.88~-1.49) | * | |
| North Africa and  Middle East | 6.82  (5.01~9.17) | 3.72 (3.06~4.50) | -1.95  (-2.05~-1.86) | * |  | 103.09 (79.85~130.08) | 78.31 (65.42~93.68) | -0.92  (-1.04~-0.81) | * |  | | 229.15 (178.10~290.73) | 228.62 (188.15~276.13) | -0.03  (-0.26~0.2) | 0.80 | |
| Oceania | 4.96  (3.27~7.86) | 4.84 (3.12~7.64) | 0.05  (-0.11~0.01) | 0.12 |  | 71.04 (47.25~109.11) | 67.37 (46.31~102.22) | -0.16  (-0.26~-0.06) | * |  | | 223.44 (160.30~329.37) | 229.77 (159.29~349.03) | 0.11 (0.04~0.17) | * | |
| South Asia | 2.33 (1.94~2.82) | 2.39 (1.9~2.92) | 0.09  (-0.10~0.28) | 0.34 |  | 32.13 (27.23~38.44) | 32.01 (25.86~37.74) | 0.03  (-0.41~0.46) | 0.91 |  | | 62.93 (50.98~75.81) | 68.12 (55.52~79.73) | 0.30  (0.03~0.57) | * | |
| Southeast Asia | 5.65 (4.80~6.79) | 5.15 (4.07~6.42) | -0.27  (-0.44~-0.11) | * |  | 96.84 (81.42~115.98) | 88.73 (72.34~106.39) | -0.27  (-0.40~-0.14) | * |  | | 238.45 (194.24~285.15) | 268.73 (217.66~323.31) | 0.36 (0.27~0.45) | * | |
| Southern Latin America | 13.04 (11.18~15.11) | 3.41 (2.85~4.06) | -4.14  (-4.41~-3.88) | * |  | 169.67 (153.95~186.12) | 82.34 (73.12~92.12) | -2.26  (-2.37~-2.14) | * |  | | 357.21 (316.71~399.62) | 252.93 (218.84~288.59) | -1.09  (-1.25~-0.92) | * | |
| Southern Sub-Saharan  Africa | 9.35 (7.5~11.59) | 6.27 (5.19~7.53) | -1.28  (-1.70~-0.85) | * |  | 89.28 (73.08~113.44) | 96.44 (83.15~111.67) | 0.24  (-0.59~1.08) | 0.57 |  | | 192.89 (159.64~237.86) | 217.54 (187~250.84) | 0.33  (-0.10~0.77) | 0.14 | |
| Tropical Latin America | 5.05 (4.69~5.45) | 2.55 (2.35~2.77) | -2.19  (-2.53~-1.86) | * |  | 80.71 (76.34~85.30) | 52.72 (48.88~56.28) | -1.31  (-1.43~-1.20) | * |  | | 191.57 (176.97~204.33) | 178.9 (160.63~194.12) | -0.08  (-0.17~0.01) | 0.1 | |
| Western Europe | 11.46 (10.79~12.16) | 4.00 (3.67~4.37) | -3.41  (-3.60~-3.23) | * |  | 200.12 (193.74~206.68) | 98.82 (93.89~103.79) | -2.28  (-2.35~-2.20) | * |  | | 538.79 (508.53~562.35) | 348.53 (311.69~373.91) | -1.40  (-1.5~-1.29) | * | |
| Western Sub-Saharan  Africa | 0.82 (0.65~1.00) | 0.87 (0.66~1.14) | 0.20  (0.12~0.28) | * |  | 15.97 (12.82~19.41) | 18.35 (14.57~22.81) | 0.47 (0.38~0.56) | * |  | | 49.08 (39.59~59.11) | 57.32 (47.93~68.03) | 0.52 (0.47~0.57) | * | |

**Table 4. The female death rate per 100,000 and AAPC of different group TBL cancer according to regional stratification between 1990 and 2021**

|  | **Young-set** | | | |  | **Middle-set** | | | |  | **Old-set** | | | | | |
| --- | --- | --- | --- | --- | --- | --- | --- | --- | --- | --- | --- | --- | --- | --- | --- | --- |
|  | Mortality1990 | Mortality 2021 | AAPC | *P* |  | Mortality 1990 | Mortality 2021 | AAPC | *P* |  | | Mortality 1990 | Mortality 2021 | AAPC | *P* | |
| **WHO region** | | | | | | | | | | | | | | | | | | |
| African | 0.83 (0.69~1.00) | 0.76 (0.59~0.95) | -0.25  (-0.65~0.15) | 0.22 |  | 9.97  (8.13~11.90) | 11.75 (9.66~13.68) | 0.49 (0.27~0.72) | * |  | | 24.46 (19.21~30.24) | 34.15 (28.52~39.33) | 1.09 (0.95~1.22) | * | |
| Eastern mediterranean | 1.12 (0.91~1.41) | 1.44 (1.14~1.80) | 0.83 (0.69~0.97) | * |  | 10.41  (8.43~12.62) | 15.11 (12.1~18.52) | 1.22 (1.13~1.30) | * |  | | 27.10 (21.05~33.36) | 50.37 (40.62~60.34) | 2.03  (1.96~2.11) | * | |
| European | 3.28 (3.14~3.44) | 2.5 (2.34~2.67) | -0.88  (-1.01~-0.75) | * |  | 34.37 (33.19~35.45) | 40.48 (38.06~42.70) | 0.48 (0.23~0.73) | * |  | | 86.91 (79.61~91.44) | 116.99 (100.63~126.66) | 0.99 (0.84~1.14) | * | |
| Americas | 4.44 (4.30~4.57) | 2.16 (2.04~2.30) | -2.34  (-2.54~-2.15) | * |  | 68.42 (65.77~70.42) | 42.51 (40.11~44.30) | -1.54  (-1.71~-1.37) | * |  | | 164.12 (145.96~173.70) | 165.37 (141~178.75) | 0.00  (-0.15~0.14) | 0.96 | |
| South-East Asia | 1.45 (1.20~1.77) | 1.75 (1.45~2.08) | 0.64 (0.52~0.76) | * |  | 15.04 (12.66~18.16) | 17.61 (13.68~21.28) | 0.49 (0.35~0.63) | * |  | | 35.93 (28.64~44.19) | 48.98 (38.89~58.39) | 1.04 (0.91~1.16) | * | |
| Western Pacific | 5.21 (4.22~6.38) | 4.23 (3.30~5.41) | -0.70  (-0.93~-0.47) | * |  | 48.53 (40.60~57.37) | 49.48 (39.43~61.74) | 0.08  (-0.03~0.19) | 0.16 |  | | 144.64 (122.98~167.28) | 199.82 (158.07~241.19) | 1.07  (0.86~1.28) | * | |
| **Heathy system Grouping levels** | | | | | | | | | | | | | | | | | | |
| Minimal | 0.75  (0.55~1.08) | 0.85  (0.64~1.09) | 0.40  (0.27~0.52) | * |  | 10.59  (8.00~14.35) | 11.36  (8.46~14.91) | 0.21 (0.17~0.26) | * |  | | 22.62  (16.59~29.92) | 28.96  (21.56~38.02) | 0.79  (0.68~0.91) | * | |
| Limited | 0.93  (0.79~1.11) | 1.19  (1.00~1.39) | 0.77 (0.63~0.91) | * |  | 9.69  (8.19~11.48) | 12.65  (10.69~14.67) | 0.85 (0.72~0.99) | * |  | | 21.77  (17.96~26.09) | 32.02  (27.24~36.83) | 1.31  (1.12~1.5) | * | |
| Basic | 4.43  (3.68~5.33) | 3.52  (2.90~4.26) | -0.75  (-0.89~-0.60) | * |  | 42.79  (36.50~50.07) | 43.43  (35.96~52.02) | 0.06  (-0.05~0.17) | 0.29 |  | | 120.07  (102.93~139.29) | 171.84  (138.84~206.52) | 1.20  (0.98~1.43) | * | |
| Advanced | 3.92  (3.80~4.03) | 2.36  (2.25~2.47) | -1.73  (-1.84~-1.62) | * |  | 47.04  (45.48~48.18) | 43.04  (40.75~44.77) | -0.32  (-0.52~-0.12) | * |  | | 119.17  (106.95~125.33) | 147.49  (123.66~160.21) | 0.66  (0.54~0.77) | * | |
| **World bank Income levels** | | | | | | | | | | | | | | | | | | |
| Low | 1.21  (0.89~1.62) | 1.09  (0.79~1.45) | -0.35  (-0.43~-0.26) | * |  | 14.22  (10.85~18.57) | 13.78  (9.82~18.24) | -0.11  (-0.16~-0.05) | * |  | | 36.88  (28.15~47.61) | 40.48  (26.79~56.21) | 0.30  (0.24~0.35) | * | |
| Low middle | 1.34 (1.16~1.59) | 1.60  (1.38~1.84) | 0.58 (0.46~0.69) | * |  | 14.69  (12.81~17.12) | 17.07  (13.82~20.00) | 0.47  (0.37~0.58 | * |  | | 35.51  (30.92~40.0) | 43.86  (36.28~50.67) | 0.68 (0.52~0.84) | * | |
| Up middle | 4.60  (3.83~5.54) | 3.60  (2.91~4.44) | -0.80  (-0.97~-0.63) | * |  | 42.56  (36.59~49.24) | 43.86  (35.99~53.21) | 0.09  (-0.01~0.18) | 0.09 |  | | 114.19  (98.64~130.89) | 167.09  (135.09~200.85) | 1.25 (1.06~1.43) | * | |
| High | 4.24  (4.13~4.34) | 2.43  (2.33~2.52) | -1.87  (-2.00~-1.74) | * |  | 54.01  (52.23~55.27) | 48.72  (46.08~50.64) | -0.38  (-0.53~-0.23) | * |  | | 133.25  (119.18~140.34) | 165.51  (137.90~180.41) | 0.67 (0.56~0.77) | * | |
| **SDI levels** | | | | | | | | | | | | | | | | | | |
| Low | 0.66 (0.53~0.86) | 0.79 (0.63~0.96) | 0.57 (0.51~0.62) | * |  | 8.24  (6.58~10.42) | 9.59  (7.77~11.44) | 0.50 (0.38~0.61) | * |  | | 17.08 (13.00~21.68) | 24.46 (19.74~29.26) | 1.20  (1.03~1.36) | * | |
| Low-middle | 1.25 (1.08~1.48) | 1.54 (1.31~1.78) | 0.65 (0.55~0.76) | * |  | 12.19 (10.45~14.40) | 16.13 (13.66~18.75) | 0.91 (0.82~1.00) | * |  | | 29.36 (25.06~34.26) | 42.76 (36.19~49.13) | 1.26 (1.07~1.45) | * | |
| Middle | 3.57 (2.99~4.27) | 2.80 (2.36~3.31) | -0.80  (-0.93~-0.66) | * |  | 35.12  (30.1~41.08) | 33.82 (28.58~39.81) | -0.11  (-0.24~0.02) | 0.09 |  | | 95.21 (81.8~110.87) | 125.80 (101.76~149.80) | 0.90 (0.76~1.04) | * | |
| High-middle | 4.51 (3.83~5.34) | 3.74 (3.07~4.56) | -0.61  (-0.85~-0.36) | * |  | 39.34 (34.96~44.26) | 46.74 (38.95~56.07) | 0.58 (0.41~0.74) | * |  | | 100.04 (88.09~111.52) | 157.57 (128.68~187.04) | 1.49 (1.38~1.60) | * | |
| High | 4.52 (4.38~4.66) | 2.49 (2.36~2.63) | -1.94  (-2.08~-1.80) | * |  | 59.64 (57.46~61.22) | 49.51 (46.71~51.76) | -0.64  (-0.80~-0.48) | * |  | | 145.88 (130.2~153.81) | 181.48 (151.37~198.04) | 0.68 (0.57~0.78) | * | |
| **Region** | | | | | | | | | | | | | | | |  | |
| Andean Latin America | 2.55 (2.00~3.27) | 2.10 (1.48~2.91) | -0.68  (-1.88~0.54) | 0.28 |  | 24.28 (19.49~30.28) | 22.79 (16.32~30.50) | -0.06  (-0.93~0.83) | 0.90 |  | | 75.10 (59.87~93.23) | 85.23 (59.95~114.00) | 0.45  (-0.59~1.50) | 0.40 | |
| Australasia | 3.56 (3.07~4.01) | 2.43 (2.06~2.84) | -1.19  (-1.65~-0.72) | * |  | 53.77 (48.35~59.43) | 44.71 (38.81~50.65) | -0.60  (-0.71~-0.49) | * |  | | 125.18 (108.3~140.63) | 163.57 (132.14~192.66) | 0.83 (0.69~0.97) | * | |
| Caribbean | 3.04 (2.66~3.45) | 2.37 (1.91~2.98) | -0.91  (-1.09~-0.72) | * |  | 31.21 (28.25~34.62) | 37.79 (31.48~44.64) | 0.63 (0.46~0.80) | * |  | | 104.59 (92.66~116.86) | 110.2 (91.56~130.22) | 0.25  (-0.02~0.51) | 0.07 | |
| Central Asia | 3.18 (2.94~3.43) | 1.57 (1.32~1.88) | -2.22  (-2.64~-1.80) | * |  | 30.24 (28.04~32.45) | 14.78 (12.82~16.98) | -2.31  (-2.55~-2.06) | * |  | | 58.94 (53.66~63.83) | 39.96 (34.99~44.90) | -1.35  (-1.74~-0.95) | * | |
| Central Europe | 4.07 (3.80~4.34) | 3.40 (3.03~3.76) | -0.53  (-0.91~-0.15) | * |  | 37.70 (35.55~40.06) | 66.33 (60.2~72.26) | 1.81 (1.52~2.09) | * |  | | 80.99 (74.55~86.53) | 144.75 (128.87~157.94) | 1.94 (1.85~2.03) | * | |
| Central Latin America | 2.26 (2.13~2.40) | 1.57 (1.29~1.88) | -1.18  (-1.45~-0.91) | * |  | 25.20 (23.80~26.63) | 18.74 (15.73~22.17) | -1.02  (-1.35~-0.69) | * |  | | 84.54 (77.84~90.45) | 67.18 (56.74~78.01) | -0.72  (-1.02~-0.43) | * | |
| Central Sub-Saharan  Africa | 0.97 (0.62~1.51) | 1.00 (0.64~1.55) | 0.12 (0.03~0.20) | * |  | 13.41  (9.04~19.85) | 14.71 (10.14~20.92) | 0.30 (0.24~0.35) | * |  | | 28.17 (18.55~42.04) | 34.31 (23.24~51.25) | 0.64 (0.58~0.70) | * | |
| East Asia | 6.05 (4.76~7.56) | 4.88 (3.67~6.38) | -0.69  (-0.91~-0.46) | * |  | 55.91 (45.39~67.76) | 55.63 (43.11~70.92) | -0.03  (-0.19~0.14) | 0.77 |  | | 164.87 (137.12~197.14) | 230.93 (180.3~285.18) | 1.12 (0.89~1.35) | * | |
| Eastern Europe | 2.67 (2.49~2.83) | 1.87 (1.62~2.19) | -1.18  (-1.47~-0.89) | * |  | 28.58 (27.16~30.00) | 20.12 (17.86~22.68) | -1.12  (-1.57~-0.67) | * |  | | 66.95 (62.41~70.76) | 54.74 (48.46~60.25) | -0.73  (-1.05~-0.42) | * | |
| Eastern Sub-Saharan  Africa | 0.69 (0.53~0.91) | 0.75 (0.56~1.01) | 0.30  (0.18~0.41) | * |  | 9.63  (7.62~12.15) | 10.78 (8.29~13.53) | 0.37 (0.28~0.46) | * |  | | 20.89 (16.27~26.57) | 27.72 (21.74~34.19) | 0.96 (0.93~1.00) | * | |
| High-income  Asia Pacific | 2.77 (2.54~3.00) | 1.50 (1.34~1.72) | -2.00  (-2.28~-1.72) | * |  | 26.58 (24.78~28.31) | 18.58 (16.4~20.60) | -1.25  (-1.60~-0.90) | * |  | | 119.46 (103.31~129.62) | 122.92 (91.11~142.49) | 0.07  (-0.10~0.23) | 0.42 | |
| High-income  North America | 6.62 (6.36~6.84) | 2.42 (2.31~2.54) | -3.22  (-3.55~-2.89) | * |  | 105.45 (101.15~108.86) | 59.22 (55.76~61.89) | -1.87  (-2.06~-1.68) | * |  | | 209.94 (186.14~222.71) | 238.95 (202.06~259.79) | 0.39 (0.18~0.60) | * | |
| North Africa and  Middle East | 1.71 (1.29~2.35) | 1.68 (1.36~2.07) | -0.02  (-0.15~0.10) | 0.74 |  | 14.13 (10.78~18.82) | 17.30 (14.05~20.82) | 0.61 (0.44~0.78) | * |  | | 39.46 (28.4~53.33) | 64.25 (50.85~78.99) | 1.60 (1.22~1.99) | * | |
| Oceania | 1.80 (1.05~3.01) | 2.20 (1.31~3.72) | 0.70 (0.46~0.94) | * |  | 26.25 (15.93~42.52) | 31.58 (21.00~48.75) | 0.63 (0.57~0.70) | * |  | | 67.06 (44.23~104.40) | 81.7 0(56.89~120.44) | 0.62 (0.48~0.76) | * | |
| South Asia | 0.75 (0.62~0.88) | 1.18 (0.97~1.41) | 1.46 (1.24~1.68) | * |  | 6.92  (5.73~8.11) | 11.33 (9.37~13.51) | 1.61 (1.34~1.89) | * |  | | 14.38 (11.17~17.35) | 26.47 (22.00~31.18) | 2.07 (1.55~2.60) | * | |
| Southeast Asia | 2.91 (2.34~3.66) | 3.19 (2.44~4.00) | 0.32 (0.13~0.51) | * |  | 31.61 (26.22~38.83) | 33.61 (24.81~42.08) | 0.19 (0.13~0.25) | * |  | | 74.21 (59.48~90.95) | 103.78 (78.02~128.24) | 1.09 (1.01~1.16) | * | |
| Southern Latin America | 3.04 (2.60~3.49) | 2.24 (1.90~2.65) | -0.93  (-1.43~-0.43) | * |  | 26.83 (23.74~29.96) | 36.13 (31.73~41.01) | 0.97 (0.72~1.23) | * |  | | 75.01 (64.67~85.13) | 98.13 (81.48~114.55) | 0.85 (0.63~1.08) | * | |
| Southern Sub-Saharan  Africa | 2.72 (2.18~3.33) | 2.19 (1.77~2.73) | -0.78  (-1.34~-0.22) | * |  | 23.91 (17.78~31.99) | 32.32 (27.12~38.35) | 0.98 (0.75~1.21) | * |  | | 63.25 (46.08~86.68) | 92.62 (76.70~110.28) | 1.30 (1.08~1.52) | * | |
| Tropical Latin America | 2.32 (2.16~2.49) | 2.35 (2.18~2.54) | 0.02  (-0.31~0.35) | 0.90 |  | 23.63 (22.05~25.23) | 34.37 (31.51~37.13) | 1.18 (0.91~1.46) | * |  | | 66.28 (58.89~71.87) | 89.92 (76.41~99.55) | 1.05 (0.74~1.36) | * | |
| Western Europe | 3.30 (3.15~3.46) | 2.72 (2.53~2.89) | -0.68  (-0.86~-0.50) | * |  | 37.91 (36.31~39.30) | 49.71 (46.35~52.65) | 0.84 (0.59~1.08) | * |  | | 99.15 (89.68~105.2) | 140.03 (117.96~153.98) | 1.13 (0.98~1.29) | * | |
| Western Sub-Saharan  Africa | 0.32 (0.25~0.42) | 0.36 (0.25~0.49) | 0.38 (0.22~0.54) | * |  | 4.90  (3.78~6.20) | 5.93  (4.45~7.33) | 0.60 (0.52~0.68) | * |  | | 10.80 (8.42~13.55) | 17.51 (13.98~20.90) | 1.59 (1.50~1.68) | * | |
